# Supplementary material for: ‘Around the edges’: using behaviour change techniques to characterise a multilevel implementation strategy for a fall prevention programme
Source: Springer Nature journal article supplement (doi:10.1186/s13012-018-0798-6), 2018-08-20

Additional File 2

Timeline of initial implementation at two primary care sites and data collection for study

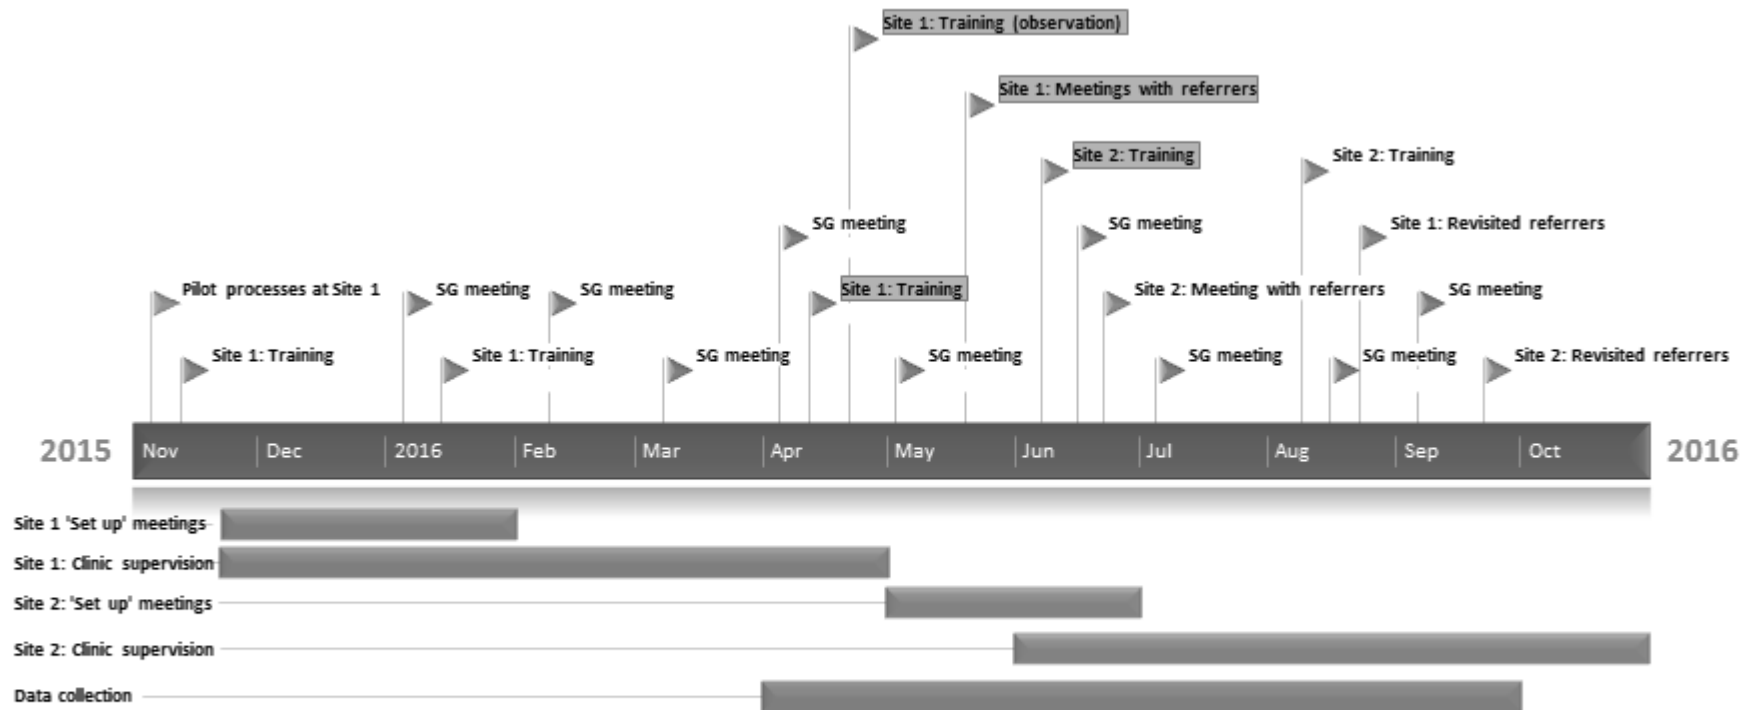

Supplement: MOESM2 [file 16058068]
