# Supplementary material for: ‘Around the edges’: using behaviour change techniques to characterise a multilevel implementation strategy for a fall prevention programme
Source: Springer Nature journal article supplement (doi:10.1186/s13012-018-0798-6), 2018-08-20
Supplement: MOESM5 [file 16058068]

**List of BCTs and functions used at the organisational level targeting behaviours ‘supporting the implementation of fall risk assessment clinics’**

|                      | Component                                                                                                                                                                                                                                                                                                                                                                         | BCT identified                                                 | Function                                  |
|----------------------|-----------------------------------------------------------------------------------------------------------------------------------------------------------------------------------------------------------------------------------------------------------------------------------------------------------------------------------------------------------------------------------|----------------------------------------------------------------|-------------------------------------------|
| ORGANISATIONAL LEVEL | <b>Assembled implementation steering group (SG)</b> <i>“of people close enough to the frontline that they knew what was going on but at the same time influential enough to make a difference.” (interview)</i>                                                                                                                                                                   | Restructuring social environment<br>Credible source            | Environmental restructuring<br>Persuasion |
|                      | Developed project plan of objectives, deliverables and timelines                                                                                                                                                                                                                                                                                                                  | Action planning, Goal setting (outcome)                        | Enablement                                |
|                      | Developed communication plan with list of tasks, target groups, methods and forums for communicating with stakeholders. Included some timelines and assigned responsibilities.                                                                                                                                                                                                    | Action planning                                                | Enablement                                |
|                      | Members of SG were involved in selling the clinics to staff being asked to run the new service: <i>“I tell them it's for an actual screening tool and that they're the decision makers around it, they can decide whether the client needs to be referred on, they can do the plan of care and that client can provide input for what they need. They like that.” (interview)</i> | Framing/reframing,<br>Vicarious consequences (for client)      | Persuasion                                |
|                      | Project manager and other SG members involved in <i>“a round of communications”</i> targeting different stakeholders: <i>“it's selling anything like that [the clinic]: [saying to stakeholders] this is fantastic, you can't do without it but it's no trouble [to implement]” (interview)</i>                                                                                   | Credible source                                                | Persuasion<br>Education                   |
|                      | Monthly meetings to discuss progress, barriers, identified potential solutions and assigned responsibility. The coordinator reported back to the SG and members provided feedback on progress and activities.                                                                                                                                                                     | Problem solving<br>Feedback on behaviour                       | Enablement<br>Education                   |
|                      | Central administrative database recording <i>“activity metrics on numbers referred, waiting times, assessment outcomes, onward referral”, reviewed at meetings to “adapt and refine pathway in response to analysis of emerging data”.</i> (document)                                                                                                                             | Self-monitoring of outcome(s) of behaviour.                    | Education<br>Enablement                   |
|                      | <b>Appointed coordinator to act as “a single point of contact”</b> for referrals and multidisciplinary team (MDT) queries                                                                                                                                                                                                                                                         | Restructuring physical environment                             | Environmental restructuring               |
|                      | Recruited administrator to manage referrals, appointments for clients and paperwork associated with assessment.                                                                                                                                                                                                                                                                   | Restructuring social environment<br>Social support (practical) | Environmental restructuring<br>Enablement |

|  |                                                                                                                                                                                                                                                   |                                                       |                                           |
|--|---------------------------------------------------------------------------------------------------------------------------------------------------------------------------------------------------------------------------------------------------|-------------------------------------------------------|-------------------------------------------|
|  | Coordinator (& SG members) identified clinic sites and rooms to hold assessments.                                                                                                                                                                 | Restructuring physical environment<br>Problem solving | Environmental restructuring<br>Enablement |
|  | <b>Set up multidisciplinary teams to deliver assessments</b>                                                                                                                                                                                      |                                                       |                                           |
|  | Coordinator (& SG members) met heads of discipline to identify staff for teams: <i>“you identify staff that are suitable and competent to be trained to work within the clinics.../you have to identify people who want to do it” (interview)</i> | Restructuring social environment                      | Environmental restructuring               |

### List of BCTs and functions used at the professional level targeting referral to and delivery of fall risk assessment clinic

|                                                                                                                                         | Component                                                                                                                                                                                            | BCT identified                                                        | Function                 |
|-----------------------------------------------------------------------------------------------------------------------------------------|------------------------------------------------------------------------------------------------------------------------------------------------------------------------------------------------------|-----------------------------------------------------------------------|--------------------------|
| PROFESSIONAL LEVEL: MDT                                                                                                                 | <b>Coaching MDT</b>                                                                                                                                                                                  |                                                                       |                          |
|                                                                                                                                         | Planned clinics (2 hrs on a set day) with MDT & heads of discipline.                                                                                                                                 | Action planning                                                       | Enablement               |
|                                                                                                                                         | Regular contact between MDT & coordinator to answer clinical, administrative & logistical queries.                                                                                                   | Social support (unspecified)<br>Social support (practical)            | Enablement               |
|                                                                                                                                         | Meetings between MDTs, coordinator & SG members to address problems. Teams told <i>“its your clinic”</i> & encouraged to drive decisions (interview)                                                 | Problem-solving<br>Framing & reframing                                | Enablement<br>Persuasion |
|                                                                                                                                         | Administrator coordinated referrals and appointments, dealt with client queries, sent records and documentation to MDT in advance of clinics and visited clinics to set up administrative processes. | Social support (practical)<br>Instruction on how to perform behaviour | Enablement<br>Training   |
|                                                                                                                                         | <b>Training MDT</b>                                                                                                                                                                                  |                                                                       |                          |
|                                                                                                                                         | Delivered by coordinator with professional qualification in nursing and <i>“clinical experience in falls”</i> (document)                                                                             | Credible source                                                       | Persuasion               |
|                                                                                                                                         | <i>Group (or one-on-one) training session</i>                                                                                                                                                        |                                                                       |                          |
|                                                                                                                                         | Instruction on what questions to ask client, assessment sequence, what info to give clients, how to return documentation.                                                                            | Instruction on how to perform behaviour                               | Training                 |
|                                                                                                                                         | Demonstration of risk assessment by coordinator (e.g. tandem stand test), and online tool to calculate risk score for fractures                                                                      | Demonstration of behaviour                                            | Training                 |
| MDT members encouraged to use expertise within team, to seek each other’s opinion and/or ask colleagues to observe parts of assessment. | Social support (practical)<br>Framing/reframing                                                                                                                                                      | Enablement<br>Persuasion                                              |                          |

|                                                                                                                                                                                                |                                                                                                |                                                     |
|------------------------------------------------------------------------------------------------------------------------------------------------------------------------------------------------|------------------------------------------------------------------------------------------------|-----------------------------------------------------|
| MDT reassured about ease of conducting assessment, that it takes time to do it properly, scope to use judgement during clinic and are reassured that its ok to ring with queries               | Verbal persuasion about capability                                                             | Persuasion                                          |
| MDT practiced calculating the FRAX score online                                                                                                                                                | Behavioural practice                                                                           | Training                                            |
| Discussed issues such as suitability of space, how best to access equipment and where to locate it.                                                                                            | Problem solving                                                                                | Enablement                                          |
| <i>MDT observed coordinator conducting an assessment with a client</i>                                                                                                                         |                                                                                                |                                                     |
| Demonstration of risk assessment by coordinator with a client                                                                                                                                  | Demonstration of behaviour                                                                     | Training                                            |
| Debriefing with MDT: coordinator discussed case and the results                                                                                                                                | Instruction on how to perform behaviour                                                        | Training                                            |
| Coordinator asked MDT about initial assessments, how they went, and the follow up required by the team.                                                                                        | Problem solving<br>Social support (unspecified)                                                | Enablement<br>Persuasion                            |
| <i>Coordinator supervised members of MDT conducting assessment</i>                                                                                                                             |                                                                                                |                                                     |
| Coordinator reviewed case and gave feedback on how assessment went, aspects they appeared comfortable with etc. Provided support and encouragement, answered questions & suggested next steps. | Feedback on behaviour<br>Social support (unspecified)                                          | Education<br>Enablement                             |
| <i>MDT visited specialist falls clinic in hospital</i>                                                                                                                                         |                                                                                                |                                                     |
| MDT attend specialist clinic at hospital to “shadow” specialist team & “see how they work because it is a little bit more detailed” (interview)                                                | Demonstration of behaviour<br>Credible source, Social comparison<br>Social support (practical) | Modelling<br>Enablement                             |
| <b>Standardised assessment documentation</b>                                                                                                                                                   |                                                                                                |                                                     |
| Standardised assessment form including instructions on what to advise client, what to do on completion & referral options                                                                      | Adding objects to the environment<br>Prompts and cues                                          | Environmental restructuring<br>Education/Enablement |
| Summary of assessment sent with onward referral, included checklist of risks identified, assessments completed & requests for follow-up                                                        | Adding objects to the environment<br>Prompts and cues                                          | Environmental restructuring<br>Enablement           |
| <b>Equipment</b>                                                                                                                                                                               |                                                                                                |                                                     |
| MDTs provided with assessment equipment filing cabinet, scanner                                                                                                                                | Adding objects to environment                                                                  | Environmental restructuring                         |
| <b>Standardised referral form</b>                                                                                                                                                              |                                                                                                |                                                     |

|                                                                                                                                                                                                                                                                                                                                                             |                                                                                                  |                                                       |
|-------------------------------------------------------------------------------------------------------------------------------------------------------------------------------------------------------------------------------------------------------------------------------------------------------------------------------------------------------------|--------------------------------------------------------------------------------------------------|-------------------------------------------------------|
| Provided referrers with standardised referral form which included summary of referral criteria and exclusion criteria                                                                                                                                                                                                                                       | Adding objects to the environment<br>Prompts/cues                                                | Enablement<br>Education                               |
| <b>Standardised screening tool for PHNs to identify eligible clients</b><br>Screening tool added to PHN documentation to identify suitable referrals. This screen was required when requesting equipment: <i>“any aids or appliances that people are applying for won't be issued unless there's a falls screen” (interview)</i>                            | Adding objects to the environment<br>Prompts and cues<br>Behavioural cost                        | Enablement<br>Environmental restructuring<br>Coercion |
| <b>Information meetings with potential referrers</b><br>Meetings to “sell” the service to health professionals in the locality with referral access and share information about referral criteria. Led by coordinator, specialists in gerontology and/or project manager: <i>“it's finding the people who already have good relationships.” (interview)</i> | Credible source<br>(applies across all meetings)                                                 | Persuasion                                            |
| <i>Meetings with General Practitioners</i>                                                                                                                                                                                                                                                                                                                  |                                                                                                  |                                                       |
| GPs encouraged to refer patients to newly established single point of contact and were told prevention clinics would free up capacity in specialist service so patients would be seen quicker.                                                                                                                                                              | Vicarious consequences                                                                           | Persuasion                                            |
| Members of the SG emphasized the benefits of the clinic and minimising the amount of work involved in referral & follow-up: <i>“You have to say to the GPs ‘this is great but you won't have to do much.’”</i>                                                                                                                                              |                                                                                                  | Persuasion/Education                                  |
| <i>Meetings with Advanced Nurse Practitioners (ANPs)</i>                                                                                                                                                                                                                                                                                                    |                                                                                                  |                                                       |
| ANPs encouraged to contact coordinator to discuss cases and appropriateness of referral                                                                                                                                                                                                                                                                     | Social support (practical)<br>Feedback on behaviour                                              | Enablement<br>Education                               |
| <i>Meetings with Public Health Nurses (PHNs)</i>                                                                                                                                                                                                                                                                                                            |                                                                                                  |                                                       |
| Clinics highlighted by mgmt. at quarterly meetings. PHNs who delivered clinics provided feedback on <i>“how this works, how their patients proceeded to the clinic. So, they [other PHNs] learn from that as well.”</i>                                                                                                                                     | Credible source<br>Social comparison                                                             | Persuasion                                            |
| <b>Promotional Material</b>                                                                                                                                                                                                                                                                                                                                 |                                                                                                  |                                                       |
| Posters provided to health providers and health centres to advertise the service, provide contact details, and summarise the referral criteria                                                                                                                                                                                                              | Adding objects to the environment<br>Instruction on how to perform behaviour<br>Prompts and cues | Environmental restructuring<br>Education/Training     |
| Monthly mail shot to GPs 'to remind' them about the service                                                                                                                                                                                                                                                                                                 | Prompts and cues                                                                                 | Education                                             |

**List of BCTs and functions used at the patient level targeting attendance at the risk assessment clinic**

|                      | <b>Component</b>                                                                                                                                                                          | <b>BCT identified</b>                                                                                                                 | <b>Function</b>                                                 |
|----------------------|-------------------------------------------------------------------------------------------------------------------------------------------------------------------------------------------|---------------------------------------------------------------------------------------------------------------------------------------|-----------------------------------------------------------------|
| <b>PATIENT LEVEL</b> | <b>Standardised appointment letter and client information leaflet</b>                                                                                                                     |                                                                                                                                       |                                                                 |
|                      | Appointment letter notifying client that appointment had been made at clinic. Letter included a list of things the client should bring to the appointment & how to rearrange appointment. | Adding objects to the environment<br>Instruction on how to perform behaviour<br>Imaginary reward                                      | Environmental restructuring<br>Education/Training<br>Persuasion |
|                      | Information leaflet sent to clients to invite them to attend the fall risk assessment clinic outlining purpose and benefits of assessment.                                                | Adding objects to environment<br>Instruction on how to perform behaviour<br>Information about health consequences<br>Imaginary reward | Environmental restructuring<br>Education/Training<br>Persuasion |
