# Supplementary material for: ‘Around the edges’: using behaviour change techniques to characterise a multilevel implementation strategy for a fall prevention programme
Source: Implement Sci. 2018 Aug 20;13:113. doi: 10.1186/s13012-018-0798-6 (PMC6102850; doi:10.1186/s13012-018-0798-6)
Supplement: Supplementary file 3 — Documents collated and analysed. Table of the documents collated and analysed in the study. (PDF 189 kb) [file 13012_2018_798_MOESM3_ESM.pdf]

### Additional File 3

#### Documents collated and analysed

| Description                                                            | Document                                         | Purpose of the document                                                                                                                                                                                                                       |
|------------------------------------------------------------------------|--------------------------------------------------|-----------------------------------------------------------------------------------------------------------------------------------------------------------------------------------------------------------------------------------------------|
| <b>General pathway information</b>                                     | Project Initiation Document                      | Prepared by project manager for Health Service Executive to secure funding                                                                                                                                                                    |
|                                                                        | Summary presentation to steering group           | Prepared by coordinator and administrator presented to steering group to provide a summary of changes, training and activity                                                                                                                  |
|                                                                        | Job specification for implementation coordinator | Prepared by members of SG before recruiting falls coordinator                                                                                                                                                                                 |
|                                                                        | Falls project structure diagram                  | Overview document setting out SG and terms of reference prepared by project manager                                                                                                                                                           |
|                                                                        | Meeting minutes                                  | Monthly update on progress to date and actions to be taken during installation and initial implementation at first two clinic sites (Jan-Sept 2016)                                                                                           |
| <b>Promotional material</b>                                            | Flyers                                           | Prepared by communications sub-group for GPs, pharmacies, PHNs, any other source of referral                                                                                                                                                  |
| <b>Documents used during the multifactorial risk assessment clinic</b> | Referral form                                    | Prepared by coordinator and administrator for health professionals referring to clinics.                                                                                                                                                      |
|                                                                        | Client appointment letter                        | Prepared by coordinator and reviewed by implementation steering group. Sent by administrator to client to notify him/her of appointment at local falls risk assessment clinic.                                                                |
|                                                                        | Client information leaflet                       | Prepared by coordinator and administrator, sent to client along with appointment letter.                                                                                                                                                      |
|                                                                        | 'QuickScreen' tool                               | Prepared by coordinator and administrator for multidisciplinary teams to use during assessment                                                                                                                                                |
|                                                                        | Summary of assessment form                       | Prepared by coordinator and admin for multidisciplinary teams to use on completion of assessment and reviewed by the implementation steering group. This form is returned to central admin and is sent with any onward referrals (e.g. to GP) |
|                                                                        | Description of pathway                           | Prepared by coordinator and administrator to outline core documents used in service & the main processes                                                                                                                                      |
|                                                                        | Cover sheet attendance                           | Prepared by coordinator and administrator for multidisciplinary teams to record input into assessment and activity. Form is returned to central administrator to track activity                                                               |
|                                                                        | Clinic pathway for Occupational Therapists (OT)  | Devised by OTs involved in clinics across sites. Developed in July outlining procedures before, during and after assessment.                                                                                                                  |

## Observations

| Implementation Strategy Component                                        | Description                                                                                                                                                                         | Location                                        | Duration                                                         |
|--------------------------------------------------------------------------|-------------------------------------------------------------------------------------------------------------------------------------------------------------------------------------|-------------------------------------------------|------------------------------------------------------------------|
| Training                                                                 | Small group training including instruction on assessment tool, sequence, information required, brief demonstrations of physical assessment, explanation of onward referral process. | Primary care centre, implementation sites 1 & 2 | Approx. 2 hours                                                  |
| Training                                                                 | Observation session during which multidisciplinary team observed the coordinator conducting a risk assessment with a client.                                                        | Primary care centre, implementation site 1      | Approx. 1 hour for assessment followed by questions and answers. |
| Meetings with health care professionals eligible to refer to the service | Meetings between clinical members of the implementation steering group (n=3) and primary care physicians (n=6) to introduce service, referral criteria and standardised form.       | General Practice                                | Approx. 30 minutes, after surgery hours                          |
